# Supplementary material for: Selective eye fixations on diagnostic face regions of dynamic emotional expressions: KDEF-dyn database
Source: PubMed Central journal article supplement (PMC6242984; doi:10.1038/s41598-018-35259-w), 2018-11-19
Supplement: 41598_2018_35259_MOESM1_ESM.pdf [file 41598_2018_35259_MOESM1_ESM.pdf]

**Selective eye fixations on diagnostic face regions  
of dynamic emotional expressions: KDEF-dyn database**

Manuel G. Calvo\*, Andrés Fernández-Martín, Aida Gutiérrez-García,  
and Daniel Lundqvist

\*mgcalvo@ull.edu.es

**Obtaining the database.** The KDEF-dyn stimuli and supplemental materials are available for scientific purposes, and can be downloaded from <http://kdef.se/versions.html> (KDEF-dyn II).

**S2 Stimuli. Video-clip stimuli\_MP4.** 240 video-clips, separated for each of six emotional expression categories (40 video-clips each). Available at <http://kdef.se/versions.html>

**S3 Graphs. Time-course graphs.** In the graphical representation of *time course*, only *net gaze* duration for each region (eyes, nose, and mouth) is shown. This reflects ~85% of total (100%) fixation time, (1) after saccades, blinks, and fixations < 80 ms were excluded (see *Design and measures* section), and (2) after fixations outside target regions were removed. The remaining ~15% of fixation time corresponds to (1) and (2). Fixation time in the time-course graphs was averaged for consecutive periods of 20 ms. Available at <http://kdef.se/versions.html>

**S4 Heatmaps. Video-clips of visual-scan heatmaps.** For *heatmaps*, all fixations and regions are included. The dynamic heatmaps are played in slow motion, i.e., the original 1,033-ms video-clip display is shown for 4 s. Available at <http://kdef.se/versions.html>
