# Supplementary material for: Selective eye fixations on diagnostic face regions of dynamic emotional expressions: KDEF-dyn database
Source: PubMed Central journal article supplement (PMC6242984; doi:10.1038/s41598-018-35259-w), 2018-11-19
Supplement: 41598_2018_35259_MOESM4_ESM.pdf [file 41598_2018_35259_MOESM4_ESM.pdf]

**Selective eye fixations on diagnostic face regions  
of dynamic emotional expressions: KDEF-dyn database**

Manuel G. Calvo\*, Andrés Fernández-Martín, Aida Gutiérrez-García, and Daniel Lundqvist

\*mgcalvo@ull.edu.es

**S1C Tables. Table 6a (linked with Figure 2a in the article). Time Course of Fixation Duration on Face Regions. Mean scores (*M*) and standard errors (*SE*) of proportion of fixation time on the **EYE REGION** across intervals.**

| EXPRESSION       | Interval |           |            |           |            |           |            |           |            |           |            |           |            |           |            |           |            |           |             |           |
|------------------|----------|-----------|------------|-----------|------------|-----------|------------|-----------|------------|-----------|------------|-----------|------------|-----------|------------|-----------|------------|-----------|-------------|-----------|
|                  | 1-100 ms |           | 101-200 ms |           | 201-300 ms |           | 301-400 ms |           | 401-500 ms |           | 501-600 ms |           | 601-700 ms |           | 701-800 ms |           | 801-900 ms |           | 901-1000 ms |           |
|                  | <i>M</i> | <i>SE</i> | <i>M</i>   | <i>SE</i> | <i>M</i>   | <i>SE</i> | <i>M</i>   | <i>SE</i> | <i>M</i>   | <i>SE</i> | <i>M</i>   | <i>SE</i> | <i>M</i>   | <i>SE</i> | <i>M</i>   | <i>SE</i> | <i>M</i>   | <i>SE</i> | <i>M</i>    | <i>SE</i> |
| <b>ANGER</b>     | 25.11    | 0.59      | 25.70      | 0.59      | 34.94      | 0.64      | 41.17      | 0.74      | 44.85      | 0.88      | 46.66      | 1.07      | 47.97      | 1.18      | 49.67      | 1.18      | 49.95      | 1.17      | 49.85       | 1.16      |
| <b>DISGUST</b>   | 25.61    | 0.59      | 26.29      | 0.59      | 32.95      | 0.64      | 38.26      | 0.74      | 39.35      | 0.88      | 39.02      | 1.07      | 37.37      | 1.18      | 37.21      | 1.18      | 39.22      | 1.17      | 40.28       | 1.16      |
| <b>FEAR</b>      | 24.06    | 0.59      | 25.73      | 0.59      | 34.91      | 0.64      | 40         | 0.74      | 41.10      | 0.88      | 41.66      | 1.07      | 42.47      | 1.18      | 43.44      | 1.18      | 44.17      | 1.17      | 45.85       | 1.16      |
| <b>HAPPINESS</b> | 24.52    | 0.59      | 25.67      | 0.59      | 32.82      | 0.64      | 36.70      | 0.74      | 34.74      | 0.88      | 29.94      | 1.07      | 24.82      | 1.18      | 23.03      | 1.18      | 24.44      | 1.17      | 27.02       | 1.16      |
| <b>SADNESS</b>   | 25.24    | 0.59      | 25.81      | 0.59      | 35.54      | 0.64      | 41.98      | 0.74      | 45.01      | 0.88      | 46.48      | 1.07      | 47.94      | 1.18      | 49.80      | 1.18      | 49.92      | 1.17      | 48.96       | 1.16      |
| <b>SURPRISE</b>  | 25.42    | 0.59      | 26.59      | 0.59      | 33.92      | 0.64      | 39.07      | 0.74      | 40.87      | 0.88      | 41.80      | 1.07      | 42.74      | 1.18      | 44.45      | 1.18      | 44.90      | 1.17      | 46.39       | 1.16      |

**S1C Tables. Table 6b (linked with Figure 2b in the article). Time Course of Fixation Duration on Face Regions. Mean scores (*M*) and standard errors (*SE*) of proportion of fixation time on the **NOSE REGION** across intervals.**

| EXPRESSION       | Interval |           |            |           |            |           |            |           |            |           |            |           |            |           |            |           |            |           |             |           |
|------------------|----------|-----------|------------|-----------|------------|-----------|------------|-----------|------------|-----------|------------|-----------|------------|-----------|------------|-----------|------------|-----------|-------------|-----------|
|                  | 1-100 ms |           | 101-200 ms |           | 201-300 ms |           | 301-400 ms |           | 401-500 ms |           | 501-600 ms |           | 601-700 ms |           | 701-800 ms |           | 801-900 ms |           | 901-1000 ms |           |
|                  | <i>M</i> | <i>SE</i> | <i>M</i>   | <i>SE</i> | <i>M</i>   | <i>SE</i> | <i>M</i>   | <i>SE</i> | <i>M</i>   | <i>SE</i> | <i>M</i>   | <i>SE</i> | <i>M</i>   | <i>SE</i> | <i>M</i>   | <i>SE</i> | <i>M</i>   | <i>SE</i> | <i>M</i>    | <i>SE</i> |
| <b>ANGER</b>     | 58.03    | 0.67      | 58.25      | 0.66      | 43.95      | 0.75      | 33.01      | 0.75      | 29.25      | 0.75      | 27.32      | 0.80      | 25.39      | 0.80      | 24.37      | 0.81      | 23.95      | 0.80      | 24.33       | 0.83      |
| <b>DISGUST</b>   | 57.67    | 0.67      | 57.94      | 0.66      | 45.94      | 0.75      | 35.80      | 0.75      | 33.54      | 0.75      | 32.94      | 0.80      | 32.41      | 0.80      | 31.57      | 0.81      | 30.56      | 0.80      | 30.10       | 0.83      |
| <b>FEAR</b>      | 58.54    | 0.67      | 58.21      | 0.66      | 43.97      | 0.75      | 33.63      | 0.75      | 30.20      | 0.75      | 28.45      | 0.80      | 27.33      | 0.80      | 26.58      | 0.81      | 25.90      | 0.80      | 25.36       | 0.83      |
| <b>HAPPINESS</b> | 59.19    | 0.67      | 58.74      | 0.66      | 46.17      | 0.75      | 35.18      | 0.75      | 31.02      | 0.75      | 30.54      | 0.80      | 30.17      | 0.80      | 29.44      | 0.81      | 27.83      | 0.80      | 26.30       | 0.83      |
| <b>SADNESS</b>   | 57.99    | 0.67      | 58.01      | 0.66      | 44.30      | 0.75      | 33.38      | 0.75      | 29.12      | 0.75      | 27.30      | 0.80      | 25.37      | 0.80      | 24.20      | 0.81      | 24.53      | 0.80      | 24.89       | 0.83      |
| <b>SURPRISE</b>  | 58.40    | 0.67      | 57.85      | 0.66      | 45.12      | 0.75      | 33.84      | 0.75      | 28.77      | 0.75      | 26.72      | 0.80      | 25.55      | 0.80      | 23.91      | 0.81      | 23.57      | 0.80      | 23.03       | 0.83      |

**S1C Tables. Table 6c (linked with Figure 2c in the article). Time Course of Fixation Duration on Face Regions. Mean scores (*M*) and standard errors (*SE*) of proportion of fixation time on the **MOUTH REGION** across intervals.**

| EXPRESSION       | Interval |           |            |           |            |           |            |           |            |           |            |           |            |           |            |           |            |           |             |           |
|------------------|----------|-----------|------------|-----------|------------|-----------|------------|-----------|------------|-----------|------------|-----------|------------|-----------|------------|-----------|------------|-----------|-------------|-----------|
|                  | 1-100 ms |           | 101-200 ms |           | 201-300 ms |           | 301-400 ms |           | 401-500 ms |           | 501-600 ms |           | 601-700 ms |           | 701-800 ms |           | 801-900 ms |           | 901-1000 ms |           |
|                  | <i>M</i> | <i>SE</i> | <i>M</i>   | <i>SE</i> | <i>M</i>   | <i>SE</i> | <i>M</i>   | <i>SE</i> | <i>M</i>   | <i>SE</i> | <i>M</i>   | <i>SE</i> | <i>M</i>   | <i>SE</i> | <i>M</i>   | <i>SE</i> | <i>M</i>   | <i>SE</i> | <i>M</i>    | <i>SE</i> |
| <b>ANGER</b>     | 2.13     | 0.27      | 2.19       | 0.29      | 7.47       | 0.42      | 13.30      | 0.63      | 15.29      | 0.83      | 15.42      | 0.89      | 14.96      | 0.97      | 14.37      | 0.98      | 14.41      | 0.91      | 13.71       | 0.84      |
| <b>DISGUST</b>   | 1.84     | 0.27      | 2.13       | 0.29      | 7.37       | 0.42      | 13.73      | 0.63      | 16.64      | 0.83      | 17.48      | 0.89      | 19.21      | 0.97      | 19.78      | 0.98      | 19.29      | 0.91      | 18.54       | 0.84      |
| <b>FEAR</b>      | 2.64     | 0.27      | 2.85       | 0.29      | 8.20       | 0.42      | 14.46      | 0.63      | 16.98      | 0.83      | 18.80      | 0.89      | 20.20      | 0.97      | 19.90      | 0.98      | 18.84      | 0.91      | 18.41       | 0.84      |
| <b>HAPPINESS</b> | 2.25     | 0.27      | 2.35       | 0.29      | 8.20       | 0.42      | 17.46      | 0.63      | 23.26      | 0.83      | 28.97      | 0.89      | 34.07      | 0.97      | 36.45      | 0.98      | 35.03      | 0.91      | 32.08       | 0.84      |
| <b>SADNESS</b>   | 2.17     | 0.27      | 2.41       | 0.29      | 7.19       | 0.42      | 13.13      | 0.63      | 14.96      | 0.83      | 15.76      | 0.89      | 15.56      | 0.97      | 14.76      | 0.98      | 14.68      | 0.91      | 14.37       | 0.84      |
| <b>SURPRISE</b>  | 2.13     | 0.27      | 2.25       | 0.29      | 8.01       | 0.42      | 15.56      | 0.63      | 19.23      | 0.83      | 20.30      | 0.89      | 20.54      | 0.97      | 20.61      | 0.98      | 19.32      | 0.91      | 18.08       | 0.84      |
